# Supplementary material for: Abiotic nitrous oxide formation driven by sunlight in fresh and marine waters
Source: Research Square preprint supplement (doi:10.21203/rs.3.rs-4150739/v1), 2024-04-05
Supplement: Supplementary file 1 [file 0346c6cd36cfa69c7caf4a0b.docx]

Supplementary Information for:

**Abiotic nitrous oxide formation driven by sunlight in fresh and marine waters**

Elizabeth Leon-Palmero12*, Rafael Morales-Baquero1, Bo Thamdrup2, Carolin Löscher2, and Isabel Reche1,3

1Departamento de Ecología, Universidad de Granada, E-18071 Granada, Spain

2Nordcee, Department of Biology, University of Southern Denmark, E-5230, Odense, Denmark

3Research Unit Modeling Nature (MNat), Universidad de Granada, E-18071 Granada, Spain

*Current address: Department of Geosciences, Princeton University, E-08544 Princeton, NJ, USA

Correspondence should be addressed to EL-P (email: [el23@princeton.edu](mailto:el23@princeton.edu))

**Content:**

Supplementary Tables 1 – 4

Supplementary Table 1│Results for the Kruskal-Wallis (KW) rank sum tests in the experiments on N2O photoproduction.

| Experiment | Site | df | Effect |  |  | *p* |
| --- | --- | --- | --- | --- | --- | --- |
| Experiment 1 | Cubillas  (June 2018) | 1 | Light treatment effect | 19.76 |  | < 0.001 |
| 2 | Incubation time effect | 9.49 |  | < 0.01 |
| Experiment 2 | Cubillas  (September 2018) | 1 | Light treatment effect | 12.63 |  | < 0.001 |
| 2 | Incubation time effect | 4.56 |  | 0.102 |
| Experiment 3 | Iznájar  (September 2018) | 1 | Light treatment effect | 13.71 |  | < 0.001 |
| 2 | Incubation time effect | 9.60 |  | < 0.01 |
| Experiment 4 | Cubillas  (July 2021) | 1 | Light treatment effect | 9.90 |  | < 0.05 |
| 3 | Incubation time effect | 5.01 |  | 0.250 |

df = degrees of freedom. = Chi-squared value in the Kruskal-Wallis test.

Supplementary Table 2**│**Results for the ANOVA and Kruskal-Wallis (KW) rank sum tests in the experiments on N2O photoproduction using 15N-labelled substrates in Cubillas reservoir (experiment 5), Motril coast (experiment 6) and Boknis Eck (experiment 7).

| Experiment | Substrate | Product | Effect | df | F |  | p-value |
| --- | --- | --- | --- | --- | --- | --- | --- |
| Experiment 5  (Cubillas reservoir, 2021) | 15N-NO2- | 15N-N2O | Light treatment effect | 2 | 3387.50 |  | < 0.01 |
| Incubation time effect | 2 | 2.07 |  | 0.222 |
| 45N2O | Light treatment effect | 2 | 495429.00 |  | < 0.001 |
| Incubation time effect | 2 | 2.00 |  | 0.230 |
| 46N2O | Light treatment effect | 2 | 886.73 |  | < 0.01 |
| Incubation time effect | 2 | 2.14 |  | 0.213 |
| 15N-NO3- | 15N-N2O | Light treatment effect | 2 |  | 6.00 | < 0.05 |
| Incubation time effect | 2 |  | 3.78 | 0.151 |
| 45N2O | Light treatment effect | 2 |  | 6.00 | < 0.05 |
| Incubation time effect | 2 |  | 3.78 | 0.151 |
| 46N2O | Light treatment effect | 2 | 667.22 |  | < 0.001 |
| Incubation time effect | 2 | 0.39 |  | 0.700 |
| Experiment 6  (Motril coast, 2021) | 15N-NO2- | 15N-N2O | Light treatment effect | 2 | 818.84 |  | < 0.01 |
| Incubation time effect | 2 | 2.02 |  | 0.228 |
| 45N2O | Light treatment effect | 2 | 2252.10 |  | < 0.01 |
| Incubation time effect | 2 | 1.84 |  | 0.252 |
| 46N2O | Light treatment effect | 2 | 572.32 |  | < 0.01 |
| Incubation time effect | 2 | 2.098 |  | 0.218 |
| 15N-NO3- | 15N-N2O | Light treatment effect | 2 |  | 5.89 | < 0.05 |
| Incubation time effect | 2 |  | 1.36 | 0.354 |
| 45N2O | Light treatment effect | 2 |  | 4.50 | < 0.05 |
| Incubation time effect | 2 |  | 1.18 | 0.555 |
| 46N2O | Light treatment effect | 2 | 0.10 |  | 0.766 |
| Incubation time effect | 2 | 0.60 |  | 0.590 |
| Experiment 7  (Boknis Eck, 2022) | 15N-NO2- | 15N-N2O | Light treatment effect | 1 | 79.76 |  | < 0.001 |
| Incubation time effect | 1 | 5.48 |  | < 0.05 |
| 45N2O | Light treatment effect | 1 |  | 6.55 | < 0.05 |
| Incubation time effect | 1 |  | 2.91 | 0.088 |
| 46N2O | Light treatment effect | 1 | 8.68 |  | < 0.05 |
| Incubation time effect | 1 | 1.99 |  | 0.201 |
| 15N-NO3- | 15N-N2O | Light treatment effect | 1 | 0.88 |  | 0.377 |
| Incubation time effect | 1 | 0.10 |  | 0.755 |
| 45N2O | Light treatment effect | 1 | 0.91 |  | 0.369 |
| Incubation time effect | 1 | 0.62 |  | 0.455 |
| 46N2O | Light treatment effect | 1 | 0.58 |  | 0.469 |
| Incubation time effect | 1 | 0.01 |  | 0.929 |

df = degrees of freedom. F = F value in ANOVA test. = Chi-squared value in the Kruskal-Wallis test.

Supplementary Table 3**│** Results for the ANOVA and Kruskal-Wallis (KW) rank sum tests in the experiments on N2O photoproduction using 15N-NO2- in the experiment to test the effect of HgCl2 (experiment 8).

| Substrate | Hg treatment | Product | Effect | df | F |  | p-value |
| --- | --- | --- | --- | --- | --- | --- | --- |
| 15N-NO2- | No HgCl2 addition | 45N2O | Light treatment effect | 1 |  | 6.55 | < 0.05 |
| Incubation time effect | 1 |  | 1.64 | 0.201 |
| 15N-NO2- | No HgCl2 addition | 46N2O | Light treatment effect | 1 |  | 6.55 | < 0.05 |
| Incubation time effect | 1 |  | 0.73 | 0.394 |
| 15N-NO2- | HgCl2 addition | 45N2O | Light treatment effect | 1 |  | 6.55 | < 0.05 |
| Incubation time effect | 1 |  | 2.91 | 0.088 |
| 15N-NO2- | HgCl2 addition | 46N2O | Light treatment effect | 1 |  | 6.55 | < 0.05 |
| Incubation time effect | 1 |  | 1.14 | 0.286 |
| 15N-NO2- | No HgCl2 vs HgCl2 addition | 45N2O | t1-Light-without HgCl2  vs  t1-Light-with HgCl2 | 1 |  | 5.33 | < 0.05 |
| 46N2O | 1 |  | 5.33 | < 0.05 |

df = degrees of freedom. F = F value in ANOVA test. = Chi-squared value in the Kruskal-Wallis test.

Supplementary Table 4**│** *In situ* concentration of ammonia, nitrite and nitrate, rates of biological N2O production from ammonia oxidation (nmol N2O L-1 d-1), initial *in situ* N2O concentrations (nmol L-1), and the percentage of increase in N2O per day. This % corresponds to the production of N2O per volume in relation to the initial concentration in a day. These rates were included in a previous study1.

|  |  | Depth (m) | *In situ* NH4+ (μmol L-1) | *In situ* NO2-(μmol L-1) | *In situ* NO3- (μmol L-1) | N2O production  (  nmol N2O L-1 d-1) | *In situ* N2O concentration  (nmol L-1) | Percentage of increase in N2O per day (%) |
| --- | --- | --- | --- | --- | --- | --- | --- | --- |
| Cubillas reservoir | July 2018 | 2.0 | 1.6 | 13.8 | 376.0 | 1.107 ± 0.043 | 55.2 | 2.00 |
| September 2018 | 0.5 | 2.5 | 19.3 | 177.8 | 0.180 ± 0.076 | 109.5 | 0.16 |
| 2.5 | 0.0 | 19.3 | 176.7 | 0.171 ± 0.008 | 110.2 | 0.15 |
| Iznájar reservoir | July 2018 | 3.0 | 0.0 | 20.6 | 367.6 | 0.832 ± 0.002 | 26.2 | 3.18 |
| September 2018 | 5.0 | 0.0 | 22.9 | 335.3 | 0.032 ± 0.015 | 97.9 | 0.03 |

**References:**

1. León Palmero, E. Greenhouse gases in reservoirs: from watersheds to functional genes. (Universidad de Granada, Granada, Spain, 2021).
