# Supplementary material for: Abiotic nitrous oxide formation driven by sunlight in fresh and marine waters
Source: Research Square preprint supplement (doi:10.21203/rs.3.rs-4150739/v1), 2024-04-05
Supplement: Supplementary file 2 [file 1080185d03012ab70143d498.docx]

Extended Data Information for:

**Abiotic nitrous oxide formation driven by sunlight in fresh and marine waters**

Elizabeth Leon-Palmero12*, Rafael Morales-Baquero1, Bo Thamdrup2, Carolin Löscher2, and Isabel Reche1,3

1Departamento de Ecología, Universidad de Granada, E-18071 Granada, Spain

2Nordcee, Department of Biology, University of Southern Denmark, E-5230, Odense, Denmark

3Research Unit Modeling Nature (MNat), Universidad de Granada, E-18071 Granada, Spain

*Current address: Department of Geosciences, Princeton University, E-08544 Princeton, NJ, USA

Correspondence should be addressed to EL-P (email: [el23@princeton.edu](mailto:el23@princeton.edu))

**Content:**

Extended Data Figs. 1 – 6

Extended Data Tables 1 – 4


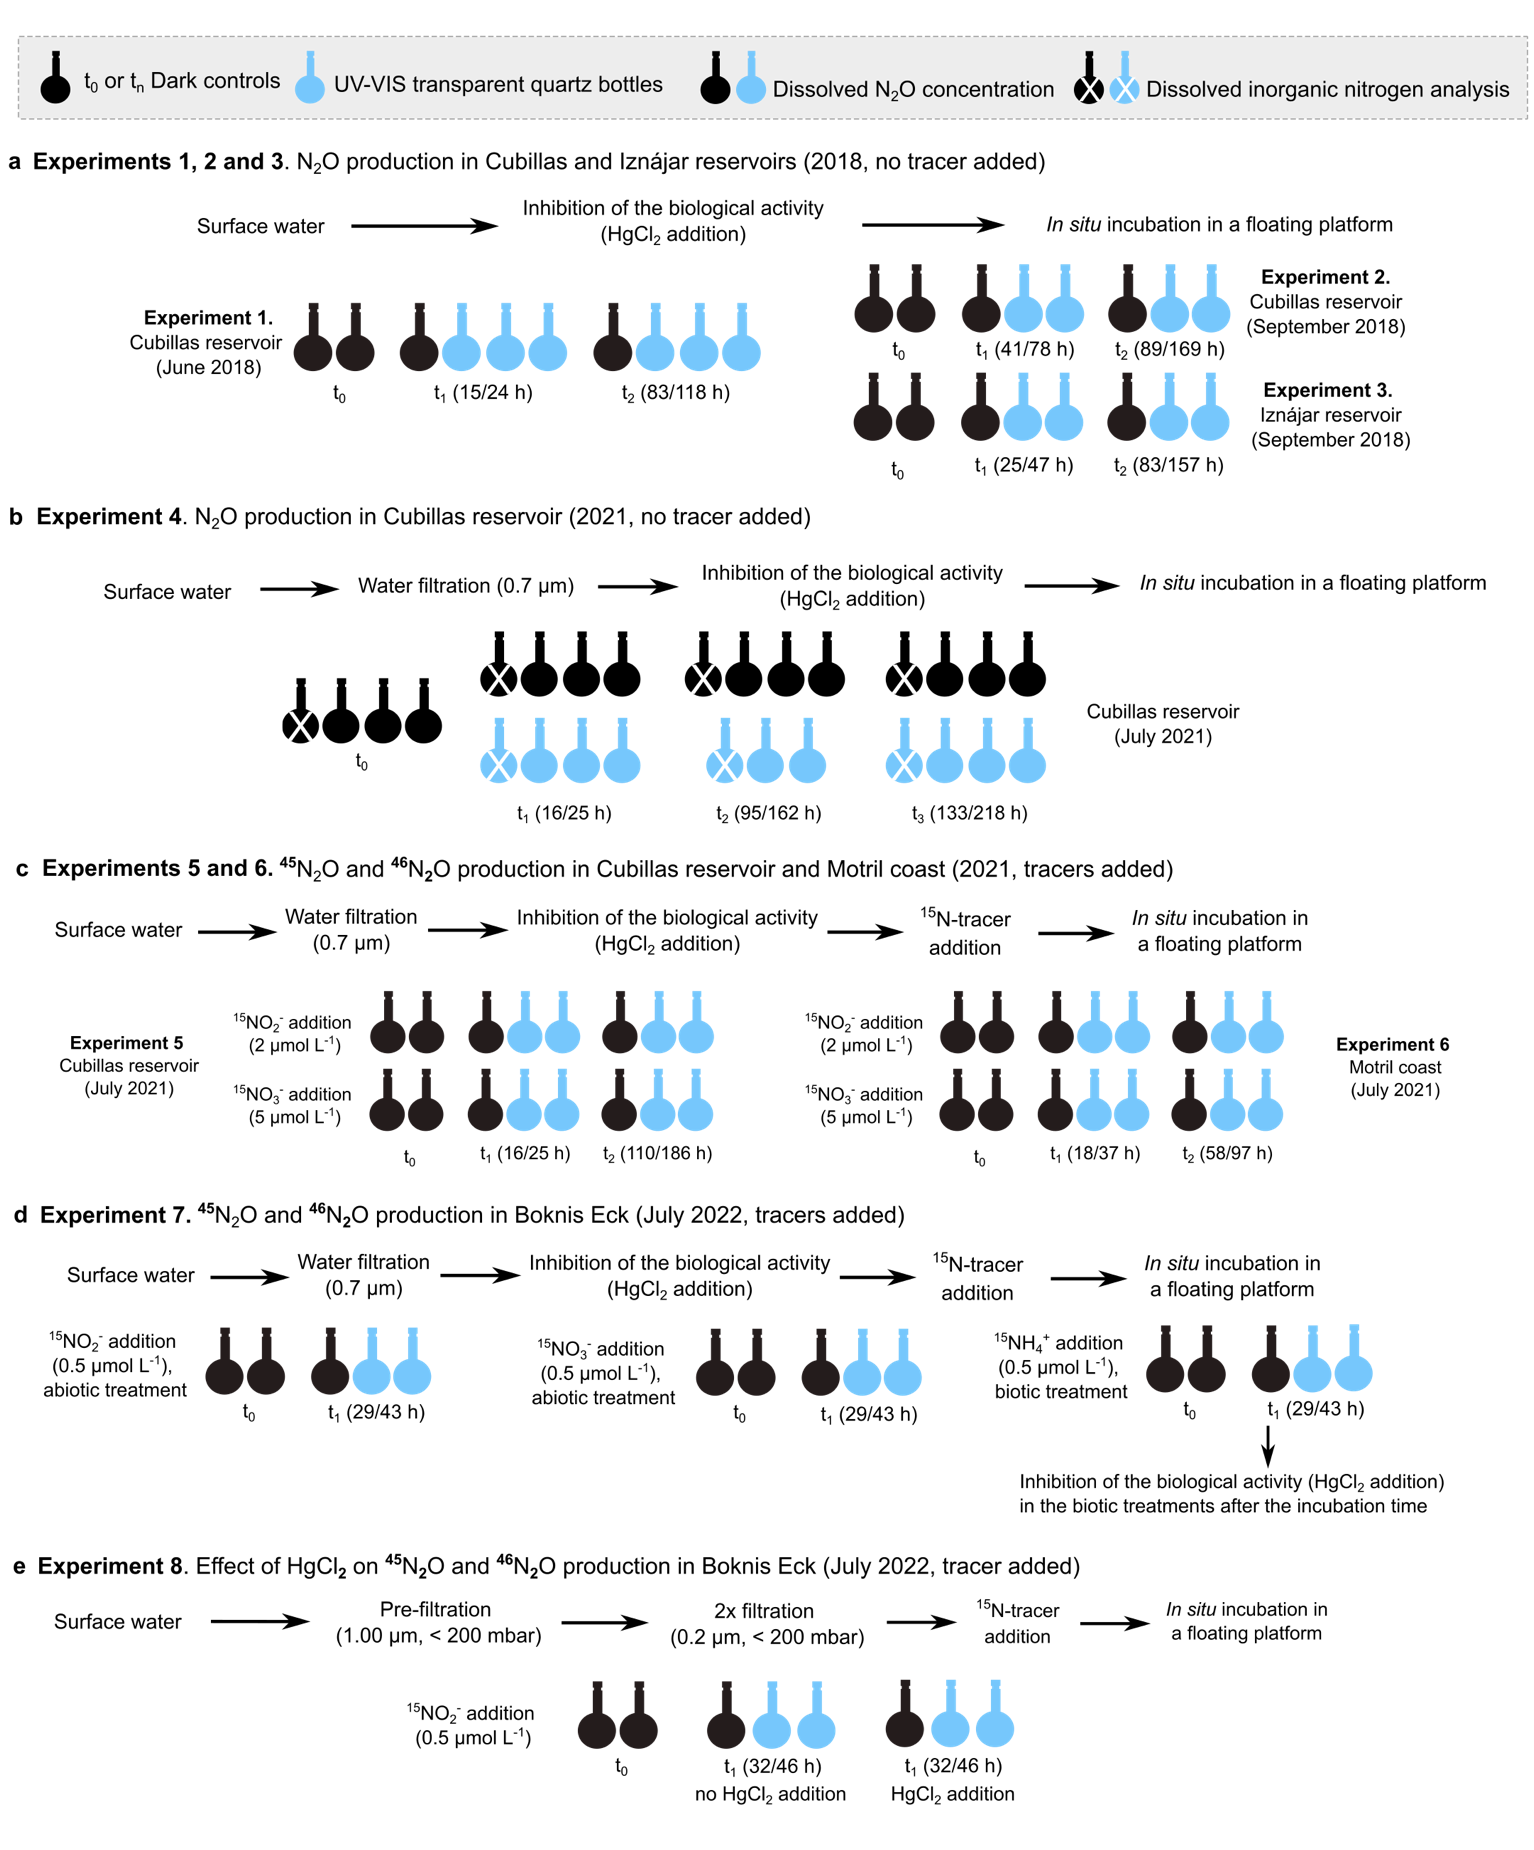


**Extended Data Figure 1** *|* **Scheme of the experimental design and procedure.** We performed experiments 1 to 4 to measure the effect of sunlight on N2O concentration, experiments 5 to 7 to measure the effect of sunlight on 45N2O and 46N2O concentrations using 15N-labelled substrates, and experiment 8 to test the effect of HgCl2 on the N2O photoproduction rates. We used dark controls and sunlight treatments over a time course in all experiments. Sunlight hours and total incubation hours are shown (e.g., 15/24 h). More details are provided in the Method section and in the main text.


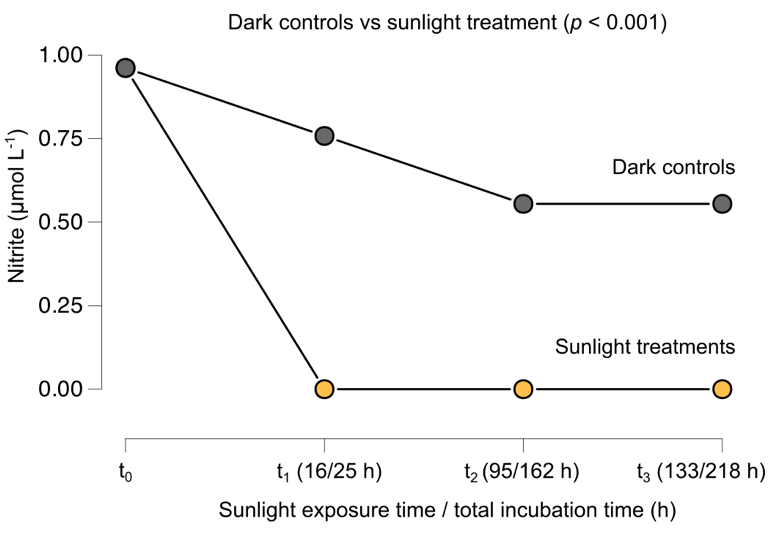


**Extended Data Figure 2** *|* **Effect of sunlight on nitrite concentration over time.** Dissolved nitrite concentrations over time in the incubation experiment 4 (i.e., sunlight/total incubation hours), performed in Cubillas in July 2021. We show dark controls in dark grey and sunlight treatments in yellow. Nitrite concentration was below detection limit (0.50 µmol L-1) in the sunlight treatments (t1 – t3). The differences between sunlight treatments and dark controls were significant (p < 0.001). The decrease over time in the dark controls was not significant (p = 0.39).


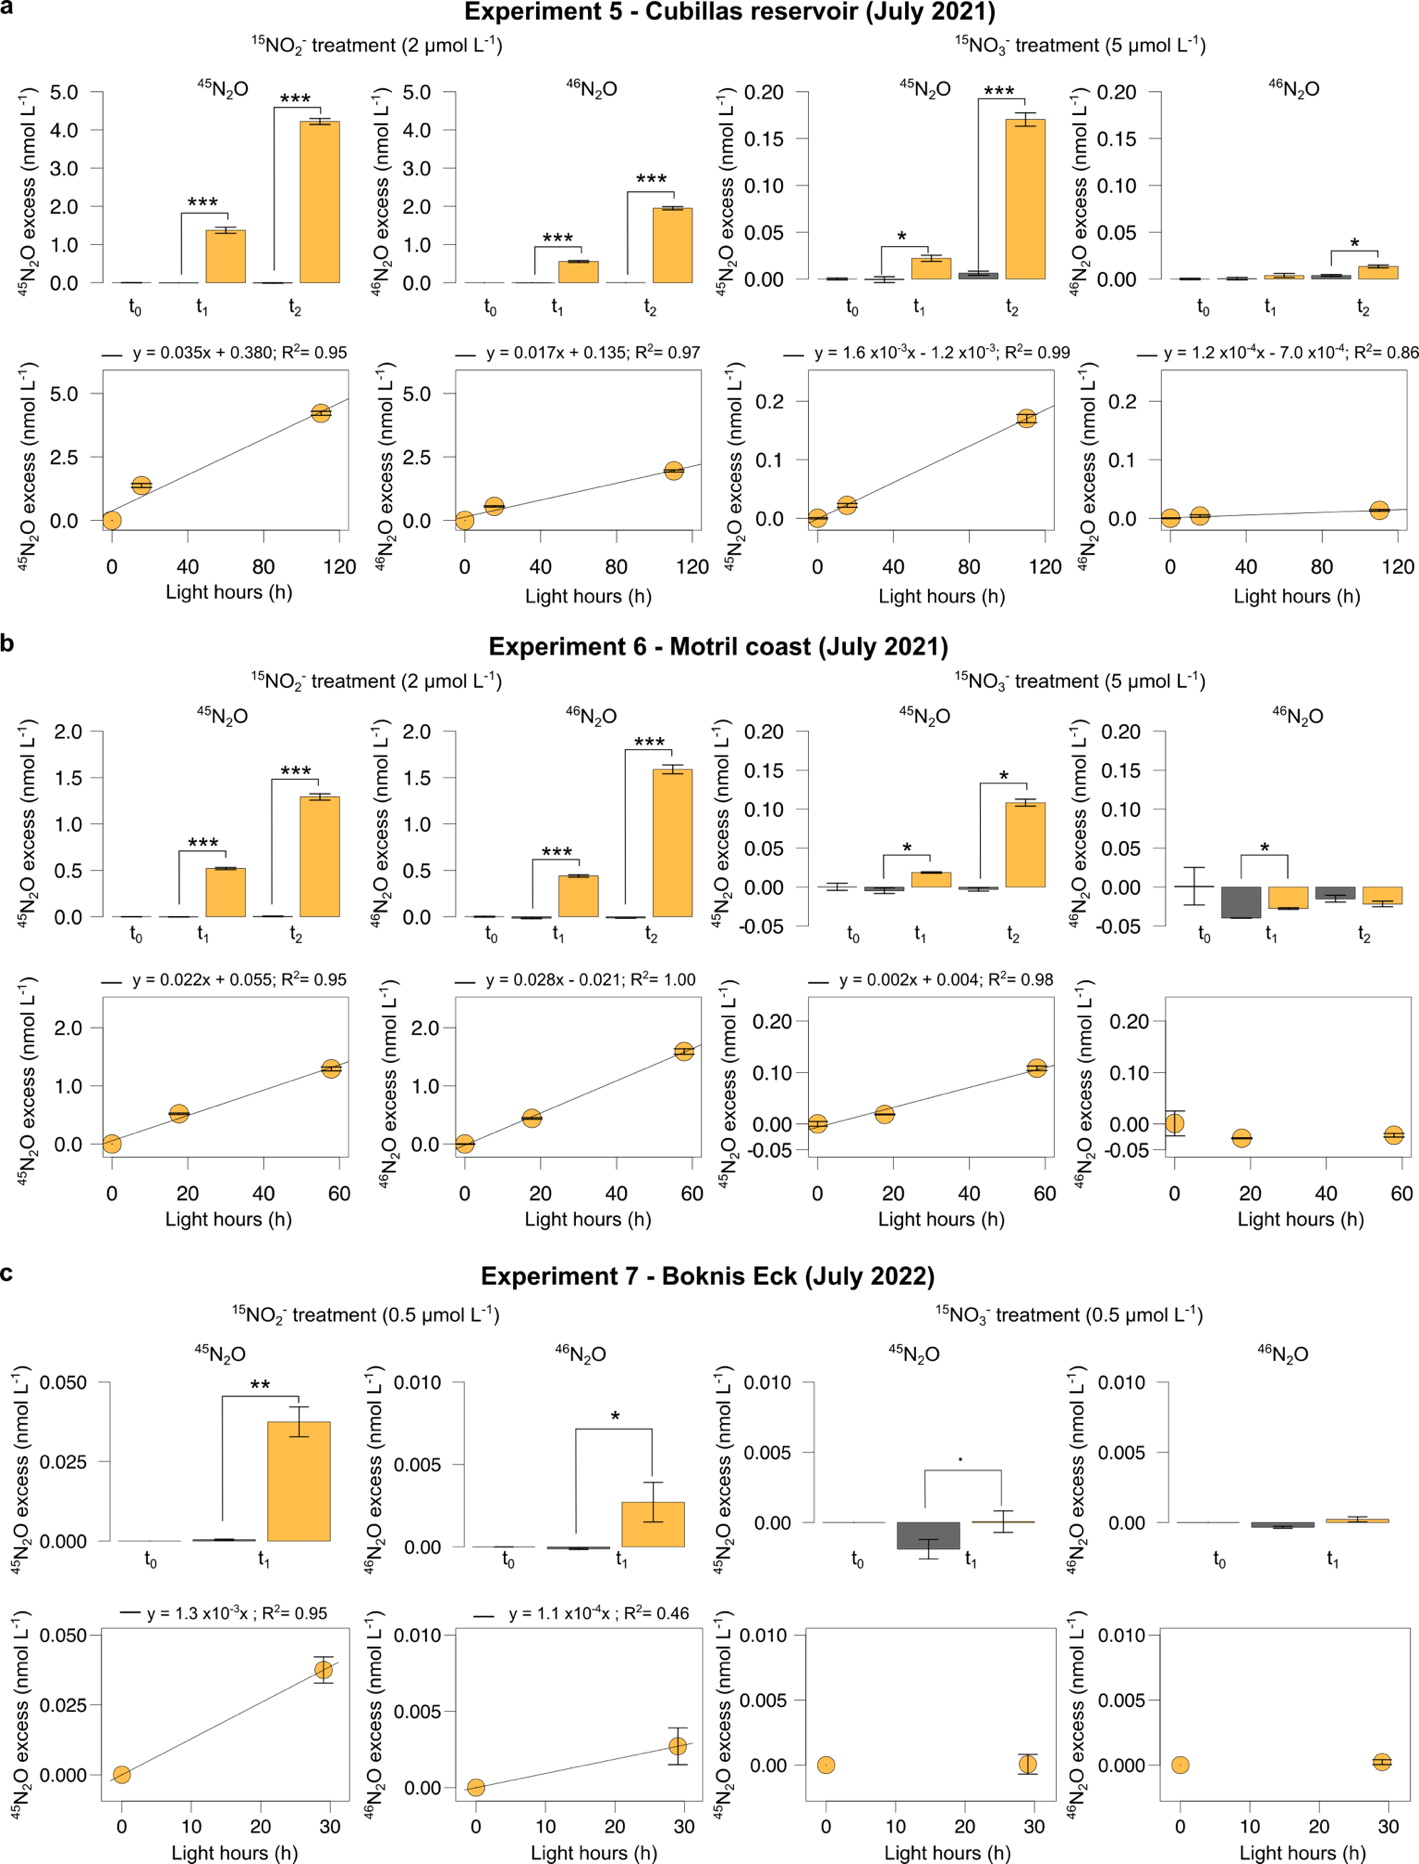


**Extended Data Figure 3** *|* **Photoproduction of 45N2O and 46N2O from 15N-NO2- and 15N-NO3-.** 45N2O and 46N2O excess (nmol L-1) over time (light hours) in the incubation experiments in (a) Cubillas reservoir, (b) Motril coast, and (c) Boknis Eck. Bars represents the mean values ± standard errors over the time course (t0-t2), including dark controls (dark grey bars) and sunlight treatments (yellow bars). Linear regression analyses are shown below each barplot. Note the different scales in the y axes. The significance of the sunlight treatments is included for each experiment: . stands for *p*<0.1; * stands for *p* < 0.05; ** stands for *p* < 0.01; and *** stands for *p* < 0.001. The photoproduction rates as function of the area, volume and radiation are presented in Extended Data Table 3, and the statistical details in Supplementary Table 2.


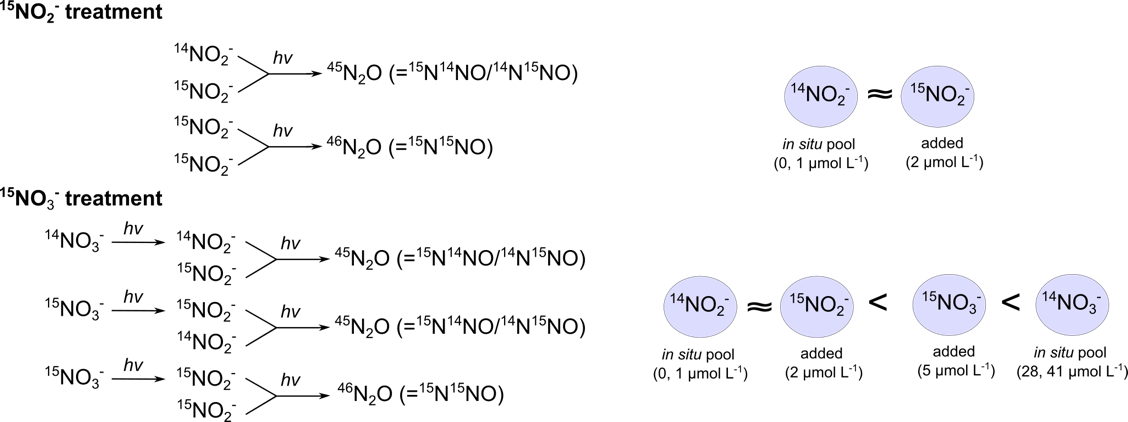


**Extended Data Figure 4** *|* **Scheme of the reactions explaining the formation of 45N2O and 46N2O from 15NO2- and 15NO3- in experiments 5 and 6 (Cubillas reservoir and Motril coast in July 2021).** The differences detected in the production of 45N2O and 46N2O in experiments 5 and 6, despite using the same amount of tracer, may be driven by the differences in the *in situ* 14N-NO2- and 14N-NO3- availabilities. While the production of 45N2O from 15N-NO2- was higher in experiment 5, the production of 45N2O from 15N-NO3- were greater in experiment 6. The production of 46N2O from 15N-NO2- was similar between both systems, but the 46N2O production from 15N-NO3- was only significant in experiment 5. *in situ* nitrite concentration was higher in the Cubillas reservoir than in the Motril coast, while nitrate showed the opposite trend.

**Extended Data Figure 5** *|* **The effect of HgCl2 on the photoproduction rates from 15N-NO2-.** 45N2O (a) and 46N2O (b) excess (nmol L-1) over time (i.e., light hours) in the incubation experiments. Bars represents the mean values ± standard errors over the time course (t0-t1), including dark controls (dark grey bars) and sunlight treatments without HgCl2 (dark yellow bars) and with HgCl2 (light yellow bars). The significant effects were included for each experiment: * stands for *p* < 0.05. Statistical details are provided in Supplementary Table 3.

**
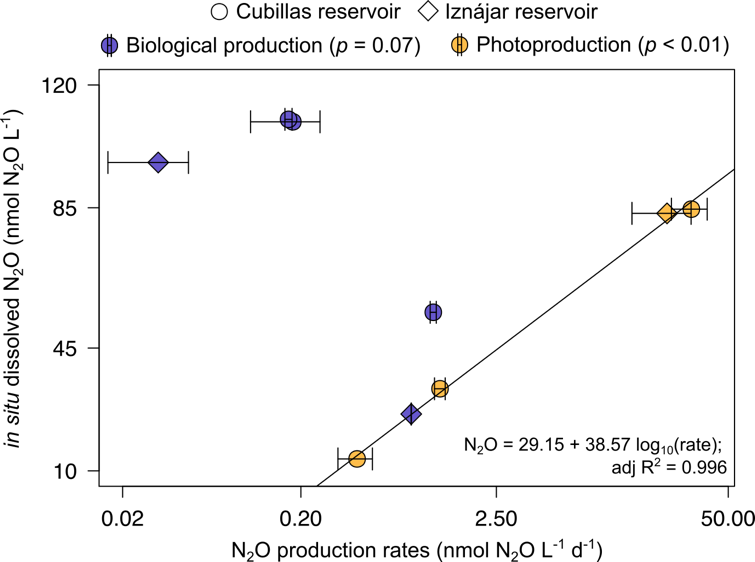
**

**Extended Data Figure 6** *|* **In situ N2O concentration (nmol N2O L-1 d-1) in Cubillas and Iznájar reservoirs as function of N2O production rates (nmol N2O L-1 d-1) by ammonia oxidation (purple), and by abiotic N2O photoproduction (yellow).** Only experiments 1 to 4 were included in the analysis.

Extended Data Table 1 *|* Date, location, and basic description of the experiments mentioned along this work. *in situ* salinity (psu) and inorganic nitrogen concentrations (μmol L-1) are also shown. < DL = below detection level.

| Experiment | Date | Study system | Incubation location | Salinity (psu) | NO3- (μmol L-1) | NO2- (μmol L-1) | NH4+ (μmol L-1) | Description | Main variable addressed |
| --- | --- | --- | --- | --- | --- | --- | --- | --- | --- |
| Experiment 1 | 6/22/2018 | Cubillas reservoir  (37.27oN, 3.68oW) | Granada, Spain  (37.18oN, 3.61oW) | 0.3 | 375.5* | 13.8* | 1.6* | No tracer used, abiotic rates | N2O conc. |
| Experiment 2 | 9/4/2018 | Cubillas reservoir  (37.27oN, 3.68oW) | Granada, Spain  (37.18oN, 3.61oW) | 0.3 | 177.7 | 19.3 | 2.5 | No tracer used, abiotic rates | N2O conc. |
| Experiment 3 | 9/9/2018 | Iznájar reservoir  (37.26oN, 4.33oW) | Granada, Spain  (37.18oN, 3.61oW) | 0.4 | 335.3 | 22.9 | < DL | No tracer used, abiotic rates | N2O conc. |
| Experiment 4 | 7/7/2021 | Cubillas reservoir  (37.27oN, 3.68oW) | Granada, Spain  (37.18oN, 3.61oW) | 0.3 | 28.2 | 1.1 | < DL | No tracer used, abiotic rates | N2O and NO2- conc. |
| Experiment 5 | 7/7/2021 | Cubillas reservoir  (37.27oN, 3.68oW) | Granada, Spain  (37.18oN, 3.61oW) | 0.3 | 28.2 | 1.1 | < DL | 15NO2- and 15NO3- used as tracers, abiotic rates | 45N2O and 46N2O conc. |
| Experiment 6 | 7/19/2021 | Motril coast  (Mediterranean Sea,  36.71oN, 3.51oW) | Granada, Spain  (37.18oN, 3.61oW) | 37.5 | 41.4 | < DL | < DL | 15NO2- and 15NO3- used as tracers, abiotic rates | 45N2O and 46N2O conc. |
| Experiment 7 | 7/1/2022 | Boknis Eck  (Baltic Sea,  54.53oN, 10.04oE) | Odense, Denmark  (55.37oN, 10.43oE) | 13.9 | < DL | < DL | < DL | 15NO2- and 15NO3- used as tracers, abiotic rates | 45N2O and 46N2O conc. |
| 7/1/2022 | Boknis Eck  (Baltic Sea,  54.53oN, 10.04oE) | Odense, Denmark  (55.37oN, 10.43oE) | 13.9 | < DL | < DL | < DL | 15NH4+ used as tracer, biotic rates |  |
| Experiment 8 | 7/1/2022 | Boknis Eck  (Baltic Sea,  54.53oN, 10.04oE) | Odense, Denmark  (55.37oN, 10.43oE) | 13.9 | < DL | < DL | < DL | 15NO2- used as tracer, abiotic rates with and without HgCl2 | 45N2O and 46N2O conc. |
| Experiment 9** | 7/4/2018 | Cubillas reservoir  (37.27oN, 3.68oW) | Granada, Spain  (37.18oN, 3.61oW) | 0.3 | 376 | 13.8 | 1.6 | 15NH4+ used as tracer, biotic rates | 45N2O and 46N2O conc. |
| 7/9/2018 | Iznájar reservoir  (37.26oN, 4.33oW) | Granada, Spain  (37.18oN, 3.61oW) | 0.5 | 177.8  and 176.7 | 19.3 | 2.5  and < DL |
| 9/4/2018 | Cubillas reservoir  (37.27oN, 3.68oW) | Granada, Spain  (37.18oN, 3.61oW) | 0.3 | 367.6 | 20.6 | < DL |
| 9/7/2018 | Iznájar reservoir  (37.26oN, 4.33oW) | Granada, Spain  (37.18oN, 3.61oW) | 0.5 | 335.3 | 22.9 | < DL |

*The N2O photoproduction rate was measured in Cubillas reservoir in June 2018 (sampling performed on June 22nd), but the *in situ* concentration of inorganic nitrogen was measured in Cubillas reservoir on July 4th 2018. **Results from Experiment 9 are part of a previous study, and included in this work for comparison26.

Extended Data Table 2 *|* Concentrations of dissolved inorganic nitrogen and N2O measured *in situ*, rates of N2O photoproduction per volume, area, and UVB and Photosynthetically Active Radiation (PAR) received, and the percentage of increase in N2O per day. This % corresponds to the production of N2O per volume in relation to the initial concentration in a day. SE = standard error. n.d. = not determined.

|  | *In situ* concentration | | | | N2O photoproduction | | | | N2O per day |
| --- | --- | --- | --- | --- | --- | --- | --- | --- | --- |
|  | NO3- | NO2- | NH4+ | Dissolved N2O |  |  |  |  | Increase in N2O per day* |
|  | µmol L-1 | µmol L-1 | µmol L-1 | nmol L-1  (mean ± SE) | nmol N-N2O  L-1 d-1 | nmol N-N2O  m-2 d-1 | nmol N-N2O  W-1 PAR | nmol N-N2O  W-1 UVB | % |
| Experiment 1 -  Cubillas reservoir (June 2018) | 375.5* | 13.8* | 1.6* | 33.4 ± 0.3 | 2.96 ± 0.20 | 40.58 ± 2.80 | n.d. | n.d. | 4.5 |
| Experiment 2 –  Cubillas reservoir (September 2018) | 177.7 | 19.3 | 2.5 | 84.6 ± 3.2 | 66.56 ± 15.11 | 680.72 ± 154.55 | n.d. | n.d. | 39.3 |
| Experiment 3 –  Iznájar reservoir, (September 2018) | 335.3 | 22.9 | 0.0 | 83.4 ± 0.8 | 47.86 ± 17.44 | 489.49 ± 178.34 | n.d. | n.d. | 28.7 |
| Experiment 4 –  Cubillas reservoir (July 2021) | 28.2 | 1.1 | 0.0 | 13.4 ± 0.2 | 1.01 ± 0.22 | 8.15 ± 1.78 | 2.6 x 10-9  ± 5.5 x 10-10 | 2.3 x 10-5  ± 4.6 x 10-6 | 3.8 |

*The N2O photoproduction rate was measured in Cubillas reservoir in June 2018 (sampling performed on June 22nd), but the in situ concentration of inorganic nitrogen was measured in Cubillas reservoir on July 4th.

Extended Data Table 3 *|* Rates of 15N-N2O photoproduction per volume (; nmol N-N2O L-1 d-1), bottle area (; nmol N-N2O m-2 d-1), and solar radiation dose ( and ; nmol N-N2O W-1). UVB radiation was not measured during experiment 7. The samples to measure the biological production of N2O in experiment 7 were incubated in darkness (covered by aluminum foil) or exposed to a natural day-night cycle, together to the samples for abiotic photoproduction rates. More details in the method section. n.s. = not significant rate. n.d. = not determined.

| Experiment | Tracer added  (final concentration) | Incubation | (nmoles N-N2O L-1 d-1) | (nmoles N-N2O m-2 d-1) | (nmoles N-N2O W-1) | (nmoles N-N2O W-1) |
| --- | --- | --- | --- | --- | --- | --- |
| Experiment 5 –  Cubillas reservoir, 2021 | 15N-NO2-  (2 µmol L-1) | Abiotic | 1.586 ± 0.141 | 21.71 ± 1.93 | 5.8 x 10-8  ± 4.5 x 10-9 | 5.1 x 10-4  ± 3.8 x 10-5 |
| 15N-NO3- (5 µmol L-1) | Abiotic | 0.174 ± 0.012 | 2.38 ± 0.17 | 6.7 x 10-9  ± 4.1 x 10-10 | 5.9 x 10-5  ± 3.7 x 10-6 |
| Experiment 6 –  Motril coast, 2021 | 15N-NO2-  (2 µmol L-1) | Abiotic | 1.132 ± 0.040 | 15.49 ± 0.55 | 4.0 x 10-8  ± 1.4 x 10-9 | 3.4 x 10-4  ± 1.3 x 10-5 |
| 15N-NO3- (5 µmol L-1) | Abiotic | 0.263 ± 0.019 | 3.60 ±0.26 | 9.3 x 10-9  ± 6.4 x 10-10 | 7.9 x 10-5  ± 5.0 x 10-6 |
| Experiment 7 –  Boknis Eck, 2022 | 15N-NO2-  (0.5 µmol L-1) | Abiotic | 0.026 ± 0.003 | 0.11 ± 0.01 | 4.3 x 10-9  ± 4.9 x 10-10 | n.d. |
| 15N-NO3- (0.5 µmol L-1) | Abiotic | n.s. | | |
| 15N-NH4+  (0.5 µmol L-1) | Biotic | 0.015 (± 0.002)(darkness)  0.007 (± 0.002) (day-night cycle) | 0.06 (± 0.01)(darkness)  0.03 (± 0.01) (day-night cycle) | 7.6 x 10-10  ± 1.7 x 10-10  (day-night cycle) |

Extended Data Table 4 *|* Increase in N2O (nmol-N2O L-1 d-1) per radiation received over time. n.s. = not significant rate determined. n.d. = not determined.

|  |  | Increase in N-N2O per  PAR radiation dose (W m-2) | | | Increase in N-N2O per  UVB radiation dose (W m-2) | | |
| --- | --- | --- | --- | --- | --- | --- | --- |
|  |  | Slope ± std. error | adj R2 | p value | Slope ± std. error | adj R2 | p value |
| No tracer added | Experiment 4,  Cubillas reservoir, 2021 | 5.9 x 10-6 ± 1.2 x 10-6 | 0.69 | < 0.001 | 0.051 ± 0.010 | 0.70 | < 0.001 |
| 15N-NO2- incubation | Experiment 5,  Cubillas reservoir, 2021 | 6.0 x 10-6 ± 4.6 x 10-7 | 0.97 | < 0.001 | 0.053 ± 0.000 | 0.97 | < 0.001 |
| Experiment 6,  Motril coast, 2021 | 6.4 x 10-6 ± 1.6 x 10-7 | 1.00 | < 0.001 | 0.054 ± 0.002 | 1.00 | < 0.001 |
| Experiment 7,  Boknis Eck, 2022 | 6.9 x 10-6 ± 1.4 x 10-6 | 0.89 | < 0.05 | n.d. | | |
|  | Experiments 5 – 7 combined | 6.3 x 10-6 ± 2.4 x 10-7 | 0.98 | < 0.001 | 0.054 ± 0.002 | 0.98 | < 0.001 |
| 15N-NO3- incubation | Experiment 5,  Cubillas reservoir, 2021 | 1.6 x 10-7 ± 8.5 x 10-9 | 0.99 | < 0.001 | 1.4 x 10-3 ± 7.5 x 10-5 | 0.98 | < 0.001 |
| Experiment 6,  Motril coast, 2021 | 1.6 x 10-7 ± 1.1 x 10-8 | 0.98 | < 0.001 | 1.4 x 10-3 ± 8.5 x 10-5 | 0.98 | < 0.001 |
| Experiment 7,  Boknis Eck, 2022 | n. s. | | | | | |
| Experiments 5 and 6 combined | 1.6 x 10-7 ± 5.8 x 10-9 | 0.99 | < 0.001 | 1.4 x 10-3 ± 4.9 x 10-5 | 0.99 | < 0.001 |
